# Supplementary material for: Trace Metals in Rice Grains and Their Associated Health Risks from Conventional and Non-Conventional Rice Growing Areas in Punjab-Pakistan
Source: MDPI journal article supplement (doi:10.3390/su15097259), 2023-04-27
Supplement: s1 [file s1]

Table S1: Details of the sampling districts, IDs along with concentrations of essential and non-essential metals.

|                  | Area           | Variety           | Sample ID | Essential metals |       |      |       | Non-essential metals |      |      |
|------------------|----------------|-------------------|-----------|------------------|-------|------|-------|----------------------|------|------|
|                  |                |                   |           | Cu               | Fe    | Mn   | Zn    | Cd                   | Ni   | Pb   |
| Non-conventional | Bahawalnagar   | Supra             | BWP-1     | 1.54             | 42.55 | 2.54 | 16.54 | 0.3                  | 0.1  | 0.62 |
|                  |                | Super Kainat      | BWP-2     | 1.61             | 51.77 | 2.61 | 15.61 | 0.1                  | 0.1  | 0.71 |
|                  |                | Basmati-2000      | BWP-3     | 1.63             | 52.44 | 1.63 | 19.63 | 0.1                  | 0.12 | 0.3  |
|                  |                | PK-86             | BWP-4     | 1.91             | 53.31 | 1.91 | 14.65 | 0.2                  | ND   | 0.44 |
|                  |                | IRRI Fine         | BWP-5     | 3.64             | 64.14 | 1.64 | 15.64 | 0.4                  | ND   | 0.96 |
|                  |                | Super Kernel      | BWP-6     | 2.68             | 74.11 | 1.68 | 18.45 | 0.3                  | 0.2  | 0.54 |
|                  | Chiniot        | Supri Lal-86      | CHT-1     | 2.7              | 32.44 | 1.74 | 12.74 | 0.2                  | 0.01 | 0.81 |
|                  |                | Super Kianat-1121 | CHT-2     | 1.61             | 43.44 | 2.61 | 14.61 | 0.11                 | 0.03 | 0.72 |
|                  |                | Super Basmati     | CHT-3     | 1.88             | 31.11 | 2.88 | 15.88 | 0.15                 | 0.01 | 0.84 |
|                  |                | Supri-86          | CHT-4     | 1.09             | 45.66 | 3.09 | 17.09 | 0.4                  | 0.02 | 0.9  |
|                  |                | Supri white-86    | CHT-5     | 1.01             | 44.44 | 2.01 | 16.01 | 0.13                 | 0.04 | 1.2  |
|                  |                | PK-386            | CHT-6     | 1.13             | 45.65 | 2.43 | 15.76 | 0.23                 | 0.05 | 0.85 |
|                  | Jhang          | Super Kernel      | JHG-1     | 1.91             | 35.34 | 1.91 | 16.91 | 0.22                 | 0.05 | 0.7  |
|                  |                | Super Fine        | JHG-2     | 1.76             | 36.22 | 3.76 | 18.76 | 0.36                 | 0.04 | 0.9  |
|                  |                | Basmati-515       | JHG-3     | 2.66             | 55.11 | 5.66 | 15.66 | 0.47                 | 0.03 | 1.1  |
|                  |                | Kainat            | JHG-4     | 1.65             | 34.11 | 3.65 | 15.65 | 0.32                 | 0.01 | 0.98 |
|                  |                | kainat-1121       | JHG-5     | 1.63             | 33.22 | 2.63 | 16.63 | 0.21                 | 0.02 | 0.85 |
|                  |                | Variety-5015      | JHG-6     | 1.18             | 37.53 | 2.33 | 16.76 | 0.33                 | ND   | 0.51 |
|                  | Shorkot        | Supra             | SHK-1     | 1.81             | 34.44 | 4.81 | 16.81 | 0.11                 | 0.06 | 0.91 |
|                  |                | Kainat            | SHK-2     | 1.51             | 33.42 | 2.51 | 15.51 | 0.22                 | 0.04 | 0.88 |
|                  |                | Supri             | SHK-3     | 2.21             | 35.44 | 1.21 | 15.21 | 0.37                 | 0.04 | 1.14 |
|                  |                | Variety-1550      | SHK-4     | 3.13             | 32.31 | 1.13 | 19.13 | 0.43                 | 0.03 | 0.99 |
|                  | Toba Tek Singh | Super Basmati     | TTS-1     | 3.05             | 38.15 | 4.05 | 18.05 | 0.31                 | 0.02 | 0.91 |
|                  |                | Kainat            | TTS-2     | 2.81             | 35.16 | 3.04 | 17.04 | 0.32                 | 0.01 | 0.94 |
|                  | Faisalabad     | Sharshar          | FSD-1     | 3.32             | 45.68 | 3.54 | 16.86 | 0.21                 | 0.02 | 0.94 |
|                  |                | Kainat            | FSD-2     | 3.76             | 56.76 | 4.11 | 14.54 | 0.23                 | 0.02 | 0.92 |
|                  |                | Super-515         | FSD-3     | 2.67             | 47.87 | 3.87 | 17.65 | 0.3                  | 0.01 | 0.76 |
| Conventional     | Narowal        | Super Lal 2500    | NRW-1     | 2.61             | 45.11 | 4.61 | 15.61 | 0.2                  | 0.01 | 0.93 |
|                  |                | Kainat            | NRW-2     | 3.81             | 46.22 | 4.81 | 13.81 | 0.45                 | 0.01 | 0.87 |
|                  |                | Supri             | NRW-3     | 3.54             | 53.22 | 4.54 | 16.54 | 0.37                 | 0.02 | 0.67 |
|                  |                | Super Basmati     | NRW-4     | 4.54             | 36.23 | 3.54 | 17.54 | 0.21                 | 0.01 | 0.66 |
|                  | Gujranwala     | Supri-KS 86       | GRW-1     | 3.61             | 35.62 | 2.61 | 12.61 | 0.23                 | 0.01 | 0.71 |
|                  |                | Basmati 386       | GRW-2     | 3.88             | 45.61 | 2.88 | 14.88 | 0.32                 | 0.01 | 0.88 |
|                  |                | Super Kernel      | GRW-3     | 2.09             | 55.81 | 3.09 | 15.09 | 0.51                 | 0.02 | 0.78 |

|                |               |       |      |       |      |       |      |      |      |
|----------------|---------------|-------|------|-------|------|-------|------|------|------|
|                | Variety 515   | GRW-4 | 2.01 | 56.22 | 3.01 | 16.01 | 0.21 | 0.03 | 0.91 |
| Hafizabad      | Super         | HFZ-1 | 1.91 | 36.32 | 2.91 | 14.91 | 0.1  | 0.02 | 0.78 |
|                | Super 86      | HFZ-2 | 2.76 | 36.34 | 1.76 | 13.76 | 0.16 | 0.02 | 0.75 |
|                | Supri Lal 86  | HFZ-3 | 2.66 | 26.45 | 1.66 | 15.66 | 0    | 0.02 | 1.1  |
|                | Super Kernel  | HFZ-4 | 3.65 | 36.91 | 1.65 | 14.65 | 0.13 | 0.01 | 0.6  |
|                |               |       |      |       |      |       |      |      |      |
| Mandi Bahaudin | Super Basmati | MBD-1 | 2.45 | 46.72 | 1.63 | 15.63 | 0.23 | 0.02 | 0.87 |
|                | PK-386        | MBD-2 | 1.36 | 47.11 | 1.45 | 16.45 | 0.41 | 0.01 | 0.91 |
|                | Supri         | MBD-3 | 1.61 | 52.44 | 3.36 | 15.36 | 0.31 | 0.05 | 0.12 |
|                | Kainat        | MBD-4 | 2.47 | 32.55 | 4.61 | 18.61 | 0.22 | 0.01 | 0.77 |
| Sialkot        | Super Basmati | SLK-1 | 1.81 | 36.11 | 4.47 | 17.47 | 0.27 | 0.03 | 0.77 |
|                | Super Fine    | SLK-2 | 1.51 | 46.43 | 2.81 | 19.81 | 0.31 | 0.02 | 0.75 |
|                | PK-86         | SLK-3 | 1.21 | 56.45 | 2.51 | 21.51 | 0.41 | 0.01 | 0.95 |
|                | PS-2          | SLK-4 | 1.13 | 25.43 | 2.21 | 20.21 | 0.3  | 0.03 | 0.81 |
|                | Supri         | SLK-5 | 4.05 | 26.12 | 2.13 | 19.13 | 0.47 | 0.05 | 0.89 |
|                | White-86      | SLK-6 | 3.04 | 66.01 | 1.05 | 14.05 | 0.5  | 0.03 | 0.94 |
| Sheikhupura    | Super         | SKP-1 | 2.81 | 64.49 | 2.04 | 15.04 | 0.21 | 0.03 | 0.82 |
|                | Super Fine    | SKP-2 | 1.82 | 35.11 | 4.81 | 16.82 | 0.51 | 0.02 | 0.92 |
|                | Kainat        | SKP-3 | 1.91 | 36.32 | 4.82 | 16.91 | 0.54 | 0.04 | 0.62 |
|                | PK-386        | SKP-4 | 2.33 | 47.32 | 3.91 | 17.61 | 0.2  | ND   | 0.91 |
